# Supplementary material for: Goal conflict in chronic pain: day reconstruction method
Source: PeerJ. 2018 Aug 15;6:e5272. doi: 10.7717/peerj.5272 (PMC6098675; doi:10.7717/peerj.5272)
Supplement: Supplemental Information 1 [file peerj-06-5272-s001.xlsx]

## Sheet: INSTRUCTIONS
	PAM-I STUDY - OBSERVATIONAL PART
	Instructions: this file serves the purpose of collecting the data per participants in an anonymous and uniform way. Please be thorough when typing in the data. In case of doubt, ask the researcher responsible for data-acquisition for clarification. Please always make sure to note the right participant number, so that all data can be correctly linked. Below is an explanation and button for each ta…
	In the file DAGSTRUCTUUR all data from the paper version is collected. Always indicate the right participant number. Explanations for each variable and which data to collect is explained. Also count the number of conflicts reported by the participants (= total number of conflicttables filled in).					Take over all information from all conflicttables in the file CONFLICTEN. Caution: each row signals a conflict. When a participant reports multiple conflicts, multiple rows should be filled in for this participant. Do not forget to repeat the participant-number in that case. Also, complete the data per conflict that was scored in the bundle "interview vragenlijst" here [this part is indicated in …					Put in all data regarding the scoring of the day in general here. One line equals one participant. Except for the participant ID, all data should be numeric.
		DAGSTRUCTUUR					CONFLICTEN					INTERVIEW DAY

## Sheet: DAGSTRUCTUUR
		DRM_DAY ("dagstructuur")									CONFLICTS
PPID	PP_TYPE	DATE_Y	DAY_Y	PAIN_SCORE	FATIGUE_SCORE	WAKING_TIME	SLEEP_TIME	ACTIVITIES_MORNING	ACTIVITIES_AFTERNOON	ACTIVITIES_EVENING	Number of Conflicts
log-in number limesurvey	Patient/control	dd/mm/yyyy	1 = Monday; 2 = Tuesday; 3 = Wednesday; 4 = Thursday; 5 = Friday; 6 = Saturday; 7 = Sunday	0-10	0-10	24U00	24u00	numeric; count number of separate activities; if accolades/brackets ({), in front of activities: count as 1			numeric; total number
pamp0048467	patient	2014-10-14	2	5	6	8u30	23u30	5	7	5	2
pamc0026560	control	2014-10-14	2	0	0	7u30	23u00	8	9	4	0
pamc0014822	control	2014-10-20	1	0	0	05u30	23u30	9	8	6	5
pamp0058851	patient	2014-10-22	3	7	7	5u00	00u45	9	8	4	2
pamp0102065	patient	2014-10-23	4	7	8	6u20	23u00	4	10	4	2
pamp0067892	patient	2014-10-23	4	5	4	8u45	00u00	4	4	5	4
pamp0125697	patient	2014-10-27	1	7	8	11u00	22u30	5	6	5	1
pamp0072841	patient	2014-10-28	2	5	6	9u00	22u45	5	6	5	2
pamp0087912	patient	2014-10-28	2	8	8	11u00	2u00	3	12	3	2
pamp0172397	patient	2014-10-29	3	5	5	8u15	22u45	7	2	3	2
pamp0131744	patient	2014-11-03	1	7	8	07u00	22u45	9	8	4	2
pamc0067893	control	2014-11-03	1	0	1	08u30	23u00	5	6	6	2
pamc0032447	control	2014-11-03	1	0	3	09u15	22u15	8	8	2	1
pamp0162331	patient	2014-11-04	2	6	7	6u45	22u00	6	7	2	3
pamp0241379	patient	2014-11-04	2	8	7	8u00	22u30	7	6	4	3
pamp0295346	patient	2014-11-04	2	6	6	10u15	01u30	4	4	3	1
pamc0087913	control	2014-11-04	2	0	1	4u30	21u30	8	9	4	2
pamp0217622	patient	2014-11-06	4	4	2	6u00	22u00	7	5	3	1
pamp0189575	patient	2014-11-06	4	4	5	7u30	22u10	7	6	6	0
pamp0098737	patient	2014-11-06	4	6	7	9u00	23u45	2	8	6	2
pamp0276757	patient	2014-11-11	2	5	4	8u40	23u10	4	8	5	1
pamp0235355	patient	2014-11-11	2	5	4	7u30	23u00	6	10	7	0
pamp0193167	patient	2014-11-13	4	7	8	9u00	23u00	9	7	0	1
pamp0258136	patient	2014-11-12	3	7	7	6u30	22u30	10	8	10	0
pamc0058852	control	2014-11-12	3	0	7	6u30	00u30	9	4	3	0
pamp0332500	patient	2014-11-13	4	8	8	10u30	00u30	4	6	4	4
pamc0048468	control	2014-11-13	4	0	6	7u15	00u30	8	5	9	4
pamc0125698	control	2014-11-17	1	4	3	7u30	02u00	5	5	8	2
pamp0359566	patient	2014-11-17	1	9	9	7u30	23u00	6	5	5	0
pamp0119615	patient	2014-11-17	1	5	6	8u15	21u30	9	5	3	0
pamc0193168	control	2014-11-18	2	3	6	7u15	22u05	6	10	5	3
pamc0098738	control	2014-11-18	2	1	2	8u00	00u30	7	9	4	2
pamc0072842	control	2014-11-18	2	0	2	6u55	23u00	5	7	6	0
pamc0102066	control	2014-11-20	4	2	1	6u20	22u00	5	2	4	0
pamp0301199	patient	2014-11-24	1	4	5	06u45	23u00	8	10	6	1
pamc0155643	control	2014-11-24	1	0	3	06u15	01u30	5	10	5	2
pamp0361297	patient	2014-11-25	2	4	5	07u00	22u15	13	10	4	2
pamc0131745	control	2014-11-25	2	0	0	07u00	23u00	10	3	8	1
pamc0144844	control	2014-11-25	2	1	6	06u00	22u30	5	5	7	2
pamc0162332	control	2014-11-26	3	5	5	07u30	22u30	5	6	6	3
pamc0172398	control	2014-11-26	3	2	0	8u08	02u54	5	12	9	1
pamc0189576	control	2014-11-26	3	0	4	8u00	22u30	5	7	7	1
pamp0377746	patient	2014-11-27	4	6	3	6u00	22u00	7	9	6	2
pamp0382925	patient	2014-11-27	4	8	9	10u00	03u30	3	9	8	2
pamp0391495	patient	2014-11-27	4	6	7	7u15	22u00	8	6	5	0
pamp0408349	patient	2014-12-01	1	3	3	10U00	21U30	7	1	6	0
pamc0119616	control	2014-12-02	2	0	7	6u30	23u00	8	5	6	1
pamp0327640	patient	2014-12-04	4	6	6	7u30	24u00	7	5	6	1
PAMP0449122	patient	2015-01-13	2	8	8	9u00	22u45	9	8	4	3
pamc02030651	control	2015-01-15	4	0	2	7u30	24u00	10	7	4	3
pamp0457491	patient	2015-01-15	4	8	7	09u45	23u00	5	3	5	3
PAMP0432297	patient	2015-01-15	4	8	7	07u30	20u30	8	8	6	0
pamp0481719	patient	2015-01-19	1	8	7	07u15	22u00	9	12	5	2
pamp0414661	patient	2015-01-19	1	8	9	05u30	22u30	19	12	6	2
PAMC0235356	control	2015-01-21	3	0	1	08u45	02u15	9	6	3	3
pamc0217623	control	2015-01-22	4	0	4	7u00	22u00	8	6	3	1
pamc0285464	control	2015-01-26	1	0	0	07u00	23u00	7	8	5	2
PAMC0258137	control	2015-01-27	2	0	1	08u30	22u30	4	5	3	0
pamp0495198	patient	2015-01-27	2	6	6	08u30	01u30	7	10	7	1
pamc0262902	control	2015-01-29	4	1	3	07u30	02u00	7	4	7	1
pamc0227956	control	2015-02-03	2	0	2	07u30	23u30	12	3	8	2
pamp0508720	patient	2015-02-03	2	6	7	05u30	20u00	12	7	5	3
pamp0428180	patient	2015-02-10	2	5	8	09u00	22u00	10	8	4	0
pamc0343836	control	2015-02-20	4	0	3	08u30	23u20	7	10	3	2
pamc0241370	control	2015-02-12	4	0	1	07u00	22u30	5	4	2	0
pamc0301190	control	2015-02-12	4	1	7	10u00	24u00	4	7	4	2
pamc0359567	control	2015-02-23	1	0	0	10u00	24u30	6	10	4	1
pamp0511498	patient	2015-02-25	3	7	8	7u15	23u00	9	9	5	2
pamc0332501	control	2015-02-26	4	0	3	9u00	23u00	7	10	4	3
pamc0327641	control	2015-02-26	4	0	4	8u00	3u00	2	3	3	2
pamc0361298	control	2015-03-03	2	0	7	09u15	23u30	9	9	6	4
pamc0295347	control	2015-03-03	2	0	0	05u00	23u00	10	9	2	1
pamc0377747	control	2015-03-04	3	0	5	05u11	22u30	9	5	4	2
pamc0312568	control	2015-03-05	4	0	3	6u10	23u00	13	14	11	2
pamc0382926	control	2015-03-05	4	2	7	07u45	02u00	6	6	9	1
pamc0391496	control	2015-03-05	4	0	0	09u00	01u00	4	7	3	1
pamc0276758	control	2015-03-05	4	0	2	7u15	23u30	7	7	3	2
pamp0475786	patient	2015-03-10	2	6	6	08u50	22u15	7	5	2	1
pamc0428181	control	2015-03-12	4	0	7	13u30	3u00	0	4	8	7
pamc0408340	control	2015-03-16	1	4	6	5u50	21u00	9	2	10	1
pamp0527243	patient	2015-03-19	4	9	10	6u00	22u30	6	6	4	1

## Sheet: CONFLICTEN
																				INTERVIEW_conflict questions
PPID	Participant_type	CONFLICT_CODE	TIME	ACTIVITY1	GOAL1	GOALCATEGORY1	GOALCATEGORY_OTHER1	ACTIVITY2	GOAL2	GOALCATEGORY2	GOALCATEGORY_OTHER2	WHO	WHERE	CAUSE_OTHER	CAUSE_WHO	REASONS	DURATION	DECISION	REMARKS	STRONG	WORRY	WORRY_PAIN	STRESSED	NEED_FOR_SUPPORT	DIFFICULTY	SATISFACTION	A_HAPPY	A_ENTHOUSIASTIC	A_RELAXED	A_SAD	A_NERVOUS	A_IRRITATED	A_ANGRY	A_AFRAID	A_POWERLESS	A_FRUSTRATED	A_HELPLESS
log-in number limesurvey	patient/control	always repeat code here!	Conflict 1 - time (24u00)	description	description	1 = interpersonal/social; 2 = work/education; 3 = pleasure/leisure; 4= general mental and physical health; 5 = other (specify); 6 = intrapersonal; 7 = household; 8 = financial; 9 = pain control, avoidance, decrease	specify the category "other" if necessary	description	description	1 = interpersonal/social; 2 = work/education; 3 = pleasure/leisure; 4= general mental and physical health; 5 = other (specify); 6 = intrapersonal; 7 = household; 8 = financial; 9 = pain control, avoidance, decrease	specify the category "other" if necessary	description	description	0 = no; 1 = yes	description	description	only numeric; in s! (1 min = 60 sec; 1 hr = 3600 sec)	numeric; 0 = none of both; 1 = only one activity performed; 2 = both performed (eg: first one activity, then the other (at later time)		0-6	0-6	0-6	0-6	0-6	0-6	0-6
voorbeeld
P1		C1										later	later			moet later
P1		C2										coderen?	coderen?			gecodeerd
P1		C3														worden
pamp0048467	patient	C1	16U00	Strijken	huishouden onderhouden	7		Tv kijken	ontspanning, bij vriend zijn	1		partner	thuis	0		ik moet iets doen vs. ik moet naar mijn lichaam luisteren	1800	2	ook tv kijken tijdens strijken	4	0	4	2	4	3	5	3	1	1	4	0	4	4	0	4	4	1
pamp0048467	patient	C2	8u00	opstaan	bodystyling gaan (afspraak)	4		blijven liggen	uitrusten + pijn verminderen	9		partner	thuis	0		ik moest opstaan, want afspraak om 9u vs. pijn	1800	1	blijven liggen terwijl twijfelen	3	0	3	1	2	3	5	3	0	3	0	0	4	3	0	3	4	0
pamc0014822	control	C1	13U45	Babbelen moeder	moeder geruststellen	1		auto wassen	dochter plezier doen	1		moeder	thuis	0		dochter gevraagd voor auto te poetsen: belofte; moeder al veel tijd doorgebracht, maaar tegelijkertijd maar een uur tijd. Komt veel van de zorg op haar (deelnemer), familieleden laten weinig aan moeder weten --> deelnemer schuldgevoel; man had aangemoedigd om te verdelen (taken zorg moeder)	900	1		5	5	0	5	2	4	2	2	2	3	3	3	3	1	0	2	5	0
pamc0014822	control	C2	11u00	typen voor zoon	zoon helpen	1		tuin werken	plezier	3		alleen	thuis	0		wil zoveel mogelijk helpen: belofte + ik doe het voor hem, zoon moet zelfstandig zijn; zoon gunnen van pauze; afwerken tuin; fijn om in de tuin te werken	300	1		3	3	0	0	0	3	4	3	4	5	0	0	0	0	0	0	1	0
pamc0014822	control	C3	8u30	spullen opruimen	werk gedaan krijgen	7		klantendienst gaan	tijdsbesparing om zoon te helpen	1		alleen	winkel, parking	0		zoveel moeite om op te bergen, onllogische regeling om andersom te doen, tijdsbesparing om te kunnen typen voor zoon	300	2		vv	-999	-999	-999	-999	-999	-999	-999	-999	-999	-999	-999	-999	-999	-999	-999	-999	-999
pamc0014822	control	C4	17u	poetsen	zoon zelfstandig maken	1		zoon helpen	zoon helpen	1		kinderen	thuis	1	zoon	zoon afblokken met poetsen --> zelfstandig; werk moest gedaan zijn	900	1		-999	-999	-999	-999	-999	-999	-999	-999	-999	-999	-999	-999	-999	-999	-999	-999	-999	-999
pamc0014822	control	C5	21u	TV kijken	ontspanning	3		zoon ondervragen	zoon helpen	1		kinderen	thuis	1	zoon	graag tv programma kijken, soms nood aan rust, ontspanning, zoon helpen --> is ook nuttig voor zijn punten	300	2		2	1	0	2	0	3	4	0	2	2	0	0	1	0	0	0	1	0
pamp0058851	patient	C1	13u00	Zetel zitten	pijncontrole	9		kuisen	huishouden doen	7		vriend	thuis	1	vriend	normaal doe alles zelf, maar mocht niet, moest rusten van vriend	1800	1		4	4	2	2	2	4	5	3	2	2	4	3	3	3	3	3	4	3
pamp0058851	patient	C2	18u00	zetel zitten	pijncontrole	9		eten maken	om kinderen eten te geven	1		vriend en kinderen	thuis	1	vriend	gewoonte om alles zelf te doen, straf om het niet te mogen doen, moest rusten van vriend	600	1		4	3	3	4	3	3	4	2	2	2	4	3	3	3	3	2	2	2
pamp0102065	patient	C1	9u30	rusten voor PC	pijn vermijden	9		strijken	strijk moest gebeuren	7		partner	thuis	0		strijk stapelde zich op, drukke dag in het vooruitzicht & voelde zich reeds moe	9000	1		4	0	5	2	2	3	3	3	3	1	0	5	2	0	0	0	0	0
pamp0102065	patient	C2	22u15	gaan slapen	was moe	4		bij bezoek blijven	relatie met schoonbroer onderhouden	1		partner + schoonbroer	thuis	1	schoonbroer	was moe, het is nt sociaal om bezoek weg te sturen	2700	2	gaf zelf aanleiding aan schoonbroer om te vertrekken	5	0	0	5	4	5	4	5	4	3	0	2	3	0	0	0	0	0
pamp0067892	patient	C1	13u45	boekhouding doen	moest gedaan worden	8		op bezoek gaan bij vriendin	relatie onderhouden	1		alleen	thuis	0		mooi weer, wilde graag met fiets rijden, boekhouding kon later ook gebeuren	600	1	bezoek bij vriendin	4	0	0	0	0	0	5	4	3	4	0	0	0	0	0	0	0	0
pamp0067892	patient	C2	11u30	boodschappen	moest gedaan zijn	7		naar huis: eten klaarmaken	tijd om te eten/honger	4		alleen	kinesist	0		laat, tijd om te eten, druk in winkel op middag, planning respecteren	600	2	boodschappen --> eten	-999	-999	-999	-999	-999	-999	-999	-999	-999	-999	-999	-999	-999	-999	-999	-999	-999	-999
pamp0067892	patient	C3	17u	strijken	wilde de strijk af	7		soap op tv kijken	ontspanning	3		mama	thuis	0		er was veel strijk, wilde strijk niet uitstellen	600	1	strijken	3	0	0	0	0	0	3	4	4	4	0	0	0	0	0	0	0	0
pamp0067892	patient	C4	20u30	vragenlijst invullen	belangrijk om deel te nemen	6		bureau opruimen	moest gebeuren	7		alleen	thuis	0		bureau was een warboel, nog veel werk aan de vragenlijst	300	1	vragenlijst	3	3	0	0	0	3	3	3	2	3	0	0	0	0	0	0	0	0
pamp0125697	patient	C1	12u50	wakker blijven	controle kinderen, verantwoordelijk zijn	6		lichaam laten rusten	pijn vermijden, fysieke gezondheid	9		4 kinderen (2 eigen, 2 vriendinnen)	thuis	1	bezoekers (vriendinnen - kinderen)	verantwoordelijkheid tov vriendinnen, lichaam rusten	300	1	afspraak met kinderen	4	4	6	5	0	4	6	0	0	0	0	3	0	0	0	3	0	0
pamp0072841	patient	C1	14u	opruimen	huis netjes houden	7		lesvoorbereidingen maken	het rustiger aan doen na bezoek aan kapper, werk moet ook gedaan zijn	9		kapster	bij kapper	0		opruimen is fysiek belastend	180	1	conflict over activiteiten in de toekomst	4	4	5	4	3	3	4	1	1	1	2	4	2	0	0	0	2	1
pamp0072841	patient	C2	16u30	opruimen	huis netjes houden	7		lesvoorbereidingen maken	het rustiger aan doen, werk moet gedaan zijn	2		alleen	thuis	0		opruimen is fysiek belastend	120	1	conflict werd voorafgegaan door een eerder conflict over dezelfde activiteiten	4	4	4	4	3	2	5	1	1	2	0	2	1	0	0	0	1	1
pamp0087912	patient	C1	14u30	douche schoonmaken	niet lui overkomen, huishoudhulp helpen	6		aankleden	koud, pijn vermijden	9		alleen	thuis	0		niet lui overkomen, pijn erna, huishoudhulp helpen	20	2		4	4	5	5	1	3	3	0	0	0	3	1	3	4	1	3	5	4
pamp0087912	patient	C2	17u	pan afgieten	eten klaarmaken	7		rustpauze nemen	pijn verminderen	9		huisgenoot	thuis	0		pijn, schrik om te laten vallen	20	2		4	4	5	3	3	3	3	0	0	0	2	3	4	2	2	4	4	3
pamp0172397	patient	C1	9u30	strijken	strijk inhalen van vorige week	7		rusten in zetel	ontspannen	3		met zoon	thuis	0		wilde het wat rustiger aan doen omdat het een drukke dag was, strijk moest gedaan zijn	120	1	conflictgedrag (stekker in/uit)	3	3	3	3	3	3	3	3	2	2	2	2	2	2	2	2	2	2
pamp0172397	patient	C2	15u	langsgaan bij vriendin om haar te knippen	wilde vriendin een plezier doen	1		rusten in zetel	tijd inhalen, nood aan rust	4		met zoon	thuis	1	sms door vriendin	was reeds een lastige dag geweest, belasting verdelen	30	1		3	3	3	3	3	3	3	2	2	2	2	2	2	2	2	2	2	2
pamp0131744	patient	C1	9u15	Koffie gaan bij buren	sociaal contact	1		rusten	pijn vermijden	9		alleen	auto	0		vermoeider dan anders; zou ik niet beter rust gunnen, maar op den duur geen sociaal contact meer	600	1		5	5	5	4	3	4	3	0	0	0	3	4	5	3	0	4	5	2
pamp0131744	patient	C2	14u	verder slapen/rusten	vermoeidheid bestrijden, pijn vermijden	9		taken beginnen	huishouden, bezig kunnen zijn, geen lamzak	7		alleen	thuis (in bed)	0		vermoeidheid, vooral de pijn ook, niet uitgerust voelen, zal ik niet langer blijven liggen, zal misschien helpen vanavond	600	1	mentale schop gegeven, vaak voorkomend conflict	5	5	5	3	1	6	5	0	0	0	3	3	5	4	0	4	5	0
pamc0067893	control	C1	16u30	naar Hubo	aankoop doen, verloren tijd opvullen, nuttig bezig zijn	6		kinderen ophalen voorbereidingen	om op gemak te zijn	4		moeder	ziekenhuis	0		wou sowieso niet langer daar zitten (bij moeder); weer: fiets --> wist wat ik ging kopen, maar moet ook vervoerd worden met fiets, invullen verloren tijd	300	2		3	3	0	4	3	3	5	3	3	3	4	4	4	3	3	3	4	3
pamc0067893	control	C2	19u00	boodschappen	eieren nodig, hekel aan iets niet hebben dat je nodig hebt, stress vermijden	4		PC zitten	ontspanning, tijdvulling	3		alleen	onderweg naar huis	0		wilde eieren kopen, regen was niet volledig gedaan, maar als ik nu ga moet ik morgen niet gaan	300	2	net geen verslaving (spider solitaire - spel op pc)	3	3	3	4	3	1	5	3	3	3	3	3	4	3	3	3	4	3
pamc0032447	control	C1	13u	sporten	goed gevoel om actief bezig te zijn + gebruik maken van abonnement: wordt betaald + hobby	3		film kijken	rusten (in de zetel zitten) + gemak zijn + geen zorgen hebben	4		alleen	thuis	0		weer was slecht, sowieso drut uit omwille van GSM	120	1		1	0	0	0	0	0	6	0	0	0	0	0	0	0	0	0	0	0
pamp0162331	patient	C1	9u30	winkelen	huishouden onderhouden	7		rusten	algemene fysiek op pijl houden, pijn vermijden	9		alleen	thuis	0		veel inspanning nodig bij winkelen	300	1		3	0	1	3	0	1	4	3	4	4	0	1	0	0	0	0	0	1
pamp0162331	patient	C2	16u40	uitgebreid koken	huishouden onderhouden	7		rustiger aandoen	pijn vermijden	9		echtgenoot, zoon	thuis	1	echtgenoot	minder moeite, liever geen hulp vragen	600	1		4	0	4	3	0	0	0	4	4	4	0	0	0	0	0	2	0	1
pamp0162331	patient	C3	19u30	boek lezen	ontspanning	3		TV kijken	actualiteit volgen	6		alleen	thuis	0		rustig aandoen, boek vraagt meer aandacht, TV agressiever	300	2		3	0	0	0	0	1	5	4	4	4	0	0	0	0	0	0	0	0
pamp0241379	patient	C1	13u30	telefoontje (moeilijk gesprek)	weten hoe toestand was	1		tuin werken	ontspannen, afreageren	3		alleen	thuis	0		zag er tegenop	300	2		6	6	0	6	6	6	6	0	0	0	6	6	2	6	6	6	6	6
pamp0241379	patient	C2	16u45	rusten	pijn vermijden	9		strijken	huishouden moet gebeuren	7		alleen	thuis	0		moet dringend strijken, zag niet meer zitten	900	1		3	3	5	4	1	3	3	0	0	4	2	2	0	4	0	4	5	1
pamp0241379	patient	C3	20u30	bezoek brengen	nog eens zien	6		breien	ontspannen	3		tandarts	tandarts	1	tandarts	zag er tegenop, al veel bezoek gehad	3600	1		6	6	0	6	6	6	1	0	0	0	6	6	6	6	6	6	6	6
pamp0295346	patient	C1	17u	naar de voetbal	engagement nakomen	1		kleindochter bezoeken na 1e schooldag	kleindochter zien	1		echtgenote	thuis	1	echtgenote	wilde graag het verslag van de 1e schooldag, afspraken zijn afspraken bij de voetbal	120	1		3	4	0	3	3	4	4	2	2	2	4	3	3	0	0	0	0	0
pamc0087913	control	C1	13u30	contrabas spelen	vaardigheden oefenen	6		tv kijken	even rustig aan doen	3		alleen	thuis	0		geen zin om te spelen, wilde het wat rustiger aan doen, hoe langer je niet speelt hoe moeilijker het wordt	600	2	conflict speelde al van in de ochtend	6	5	0	5	6	5	6	1	4	2	2	5	5	5	2	5	5	3
pamc0087913	control	C2	14u	tv kijken	ontspannen	3		poetsen	werk gedaan krijgen	7		alleen	thuis	0		schuldgevoel over tv kijken in de namiddag, huishouden blijft anders liggen	1800	1	conflict blijft de hele activiteit aanwezig	6	6	0	6	6	4	2	0	0	4	0	5	5	6	6	6	6	6
pamp0217622	patient	C1	10u	huishoudelijke taken	niet achter komen met werk thuis	7		rusten	pijn verminderen	9		alleen	thuis	0		vermoeid, meer pijn	60	2		2	0	2	0	0	0	3	0	0	0	3	0	4	0	0	0	0	0
pamp0098737	patient	C1	16u00	rusten	vermijden van pijn	9		met honden wandelen	honden plezier doen	1		vriend	thuis	0		s avonds werken	300	2		4	1	4	1	1	2	3	0	0	0	0	0	0	0	0	0	0	0
pamp0098737	patient	C2	12u15	computer (betalingen doen)	administratie bijhouden	7		rusten	pijn vermijden	9		vriend	thuis	0		pijn, vermoeid, doet betalingen niet graag	120	1		4	0	4	0	0	1	3	0	0	0	0	0	0	0	0	0	0	0
pamp0276757	patient	C1	15u30	lakens verversen	huishouden draaiende houden	7		Naar buiten gaan (genieten van buiten zijn)	rusten, pijn verminderen	9		man, 2 kinderen	thuis	0		werk moet gebeuren, wou liever naar buiten	300	1		5	3	1	4	1	4	2	0	0	0	3	4	4	0	0	0	3	0
pamp0193167	patient	C1	10u30	winkelen voor mezelf	belonen vna mezelf	3		naar huis --> rusten	om andere activiteiten te kunnen doen, gezondheid	4		alleen	winkel	0		beloning voor mezelf, wist dat ik naar kapper moest, oververmoeidheid/te moe, weinig naar stad gaan, doe dat weinig voor mezelf, naar huis kunnen en rusten, zwaar als je routine doorbreekt	300	1		3	3	4	3	0	3	3	3	3	3	3	3	3	3	3	3	3	3
pamp0332500	patient	C1	10u45	bed verversen	bezig zijn	4		rusten	pijn verminderen	9		alleen	thuis	0		achteraf last, bed moet proper zijn	7200	1		5	6	6	6	0	6	6	0	0	0	6	6	6	6	5	3	6	4
pamp0332500	patient	C2	16u30	auto gaan halen	man kan naar werk gaan om geld te verdienen	8		thuis blijven en boodschappen uitlegen	pijn verminderen	9		man	thuis	1	man	zag er tegenop om terug met pedalen van auto te sukkelen	1800	2		-999	-999	-999	-999	-999	-999	-999	-999	-999	-999	-999	-999	-999	-999	-999	-999	-999	-999
pamp0332500	patient	C3	15u	naar containerpark gaan	bezig zijn	4		rusten	pijn verminderen	9		alleen	thuis	0		moet beweging hebben (stappenteller)	600	1		5	5	5	6	5	5	3	0	0	0	6	6	5	5	5	5	5	5
pamp0332500	patient	C4	20u	verzending maken	centjes ontvangen	8		rusten	ontspannen, pijn verminderen	9		man	thuis	0		verzending moet gebeuren	1800	2		5	5	5	5	5	5	3	0	0	0	4	5	5	4	4	4	5	5
pamc0048468	control	C1	7u15	in bed blijven liggen	slapen, uitrusten	4		opstaan en douchen	tijd uitsparen 's avonds	6		man, dochter	thuis	0		wil 'savonds niet meer douchen, moe, ligt liever in bed	180	1		-999	-999	-999	-999	-999	-999	-999	-999	-999	-999	-999	-999	-999	-999	-999	-999	-999	-999
pamc0048468	control	C2	14u45	blijven napraten met collega's	sociala contacten onderhouden	1		verder werken	werk afkrijgen	2		collega's	werk	0		avondles dus moet op tijd doorgaan, wil werk goed afhebben, wil andere collega's zien die je normaal niet veel ziet	60	1		5	5	0	4	0	6	3	1	1	0	4	0	4	5	0	2	5	0
pamc0048468	control	C3	21u30	laat eten	plezier	3		vroeg in bed kruipen	uitgerust zijn, vermageren	4		man	thuis	0		laat eten is niet gezond, eet graag	120	1		4	3	0	2	4	4	0	1	1	3	0	0	2	4	0	0	3	0
pamc0048468	control	C4	22u15	film kijken	samenzijn met partner	1		in bed kruipen	uitrusten	4		man	thuis	1	man	het is al laat (22u), man is uitzonderlijk thuis	60	2		5	1	0	1	1	4	6	3	3	5	0	0	0	0	0	0	0	0
pamc0125698	control	C1	12u30	thuis blijven en film kijken	ontspannen	3		darts gaan spelen	onderhouden en verbeteren contacten	1		alleen	thuis	0		slechte sfeer bij gezelschap	60	1		5	5	0	5	3	3	6	0	0	1	6	3	5	4	3	5	3	3
pamc0125698	control	C2	18u15	thuis blijven en TV kijken	ontspannen	3		naar tafeltennis gaan	onderhouden en verbeteren contacten	1		alleen	thuis	0		last van onderrug	60	1		4	4	5	1	0	1	5	3	3	5	0	0	0	0	4	0	0	1
pamc0193168	control	C1	8u15	taak afwerken voor collega	consequent zijn, proberen collega tevreden te stellen	1		ander werk/opdracht	werk moet gebeuren	2		collega's	werk	1	collega's	ene collega kwam vriendelijk vragen, maar andere collega laat persoonlijke opdrachten links liggen tot einde; door halftijds werk weinig zicht op werk, dus de indruk dat het kon wachten en het beter was om werk af te rondden (stress); afspraken	900	2	gestopt met activiteit 1 omdat de opdracht niet goed was voorbereid door collega	4	4	1	3	2	4	1	0	0	0	3	1	4	3	2	3	5	1
pamc0193168	control	C2	21U	Chips eten	genot van chips	3		gezonde keuzen maken en niet eten	pijn van tandpijn verminderen en gezondheid	9		partner	thuis	1	iemand op TV	Het kwam op TV en had daar zin in; vriendin had daar ook wel zin in; instelling avonavond ga ik niets eten (voornemen)	1800	1		4	4	6	3	5	3	1	0	0	3	4	1	4	4	1	4	4	3
pamc0193168	control	C3	22u15	TV kijken	plezier	3		gaan slapen	moe --> gezondheid	4		partner	thuis	0		vriendin niet vlug moe, minder slaap nodig als ik zij zou fijn vinden om te kijken, moe, serie interessant, dag ervoor al vroeger gaan slapen, probeer wat tegen te vechten	300	1		3	1	1	1	3	2	5	2	1	3	2	1	1	1	1	2	4	1
pamc0098738	control	C1	15u00	Lezen	pijncontrole (rugpijn)	9		biopakket afhalen	huishoudelijk, maar ook door bewegen pijn verminderen	7		alleen	bus	0		ik voelde mij heel moe, het weer was koud/killig, uitspellen was mogelijk, spannend boek	1800	1		4	0	1	1	0	1	5	0	0	3	0	3	3	0	0	0	1	0
pamc0098738	control	C2	17u00	kinderen helpen met huiswerk	kinderen helpen	1		eten/verzorgen/omkleden	mijn opdracht; tegemoet komen aan vraag ouders	2		buurkinderen	buren	0		niet altijd goed weten wat eerst te doen; kinderen kunnen meebeslissen, conflict tussen kinderen; makkelijkste zou zijn, want altijd heel hectisch om alles gedaan te krijgen; kinderen moe	600	2		4	3	0	4	0	3	5	0	0	0	0	4	4	0	0	0	3	0
pamp0301199	patient	C1	18U30	Dochter in bad steken	als niets doen, extra werk, vermijden	9		afwassen	huishouden	7		dochter	thuis	1	dochter	alleen naar boven sturen of meteen in bad steken; ik was keuken aan het opruimen en dat moest ik laten staan	120	2		3	3	4	4	1	2	6	5	4	3	0	3	0	0	0	0	0	0
pamc0155643	control	C1	15U00	Boodschappen doen	voor mezelf	6		rusten (koffie, tv)	moe	4		alleen	werk	0		het zou 's avonds laat worden, moe, 's ochtends overslapen, dus moest me haasten	600	2		2	0	0	0	0	0	5	3	3	4	0	0	0	0	0	0	0	0
pamc0155643	control	C2	23u00	iets drinken	sociaal contact	1		rusten/slapen	fysieke gezondheid	4		vriend	restaurant	0		rust nodig, vandaag (dag erna) ook weg	120	2		1	0	0	0	0	1	6	5	4	4	0	0	0	0	0	0	0	0
pamp0361297	patient	C1	8U25	Bus nemen	op werk raken, inspanning vermijden --> pijn vermijden	1		auto rijden	op het werk raken	1		alleen	thuis	0		inspanning met auto veel groter; wist dat het gevroren had en dan auto moest vrijmaken	600	1	bus nemen	2	0	4	0	0	1	5	3	3	5	0	0	0	0	0	0	0	0
pamp0361297	patient	C2	10U34	Wachten op patient	wachten	1		Verplaatsen naar andere afdeling (patient)	andere patient zien	1		alleen	werk	1	dokter	verplaatsqing; als moest wachten, kon ik andere patient niet meer zien, dus moet ik deze week nog extra doen	120	1	wachten	4	3	1	1	0	3	4	3	3	2	0	0	0	0	0	0	0	0
pamc0131745	control	C1	22u15	boek lezen	wilde het einde weten	5	nieuwsgierigheid (niet lezen om te ontspannen)	was plooien	was moest gebeuren	7		partner	thuis	0		wilde de was graag weg, wilde ook het einde van het boek weten	60	1		2	0	0	1	0	2	5	3	2	2	3	3	2	3	3	2	3	3
pamc0144844	control	C1	12u00	uit lunchen met collega	gezellig samen zijn, bijbabbelen	1		lunchen op bureau met collega	bijbabbelen	1		bureau	collega's	0		ruimte die ik niet kende	120	1		2	0	0	0	0	1	6	3	3	6	0	0	0	0	0	0	0	0
pamc0144844	control	C2	17u00	bij vrienden langsgaan	bijbabbelen, nieuwtjes uitwisselen	1		direct naar huis rijden	vroeger koken	7		alleen	dorp	0		wil vroeger eten klaarmaken, mogelijk veel volk in zaak van vrienden	120	2		4	0	0	2	0	4	6	3	3	2	0	0	0	0	0	0	0	0
pamc0162332	control	c1	8u30	klaarmaken	voor jezelf, netjes zijn	1		opruimen	huishouden	7		echtgenoot	thuis	0		praktisch gezien: wat gaat het vlugst? (volgorde; functioneel)	120	2		4	3	3	4	0	4	6	3	3	2	0	4	3	0	0	4	4	3
pamc0162332	control	c2	14u	koffiepauze	babbelen met dochter, ontspanning	1		verder afruimen	huishouden	7		dochter & kleinkinderen	dochter thuis	1	dochter	dochter zei "we gaan eerst koffie drinken"; zelf zou ik eerst afgeruimd hebben, tafel was dan proper --> gezelliger	120	2		4	0	3	3	0	4	6	0	0	2	0	0	0	0	0	0	0	0
pamc0162332	control	c3	18u45	babbelen met man	ontspanning	3		koken	huishouden	7		man	thuis	0		als ik dacht: als ik eerst ga zitten te moe/geen zin meer zou hebben om te koken	120	2		5	3	3	4	0	4	6	0	0	2	0	3	0	0	0	0	0	0
pamc0172398	control	c1	11u00	agressieve aanpak advocaat	oplossen	1		humoristische aanpak advocaat	oplossen conflict	1		alleen (hond)	thuis	1	advocaat/vriend	komt onverschillig over, onrechtvaardigheidsgevoel, afspraak is afspraak,woede-ervaring voortkomend uit ongeloof dat hij veranderd is (owv vrouw) en teleurstelling; emmer was overgelopen, maar toch samen veel meegemaakt, vrienden zijn belangrijk	14400	1	humoristische aanpak; al jaren aanslepende twijfel om vriend te laten zitten (de advocaat)	6	6	3	5	0	4	6	0	3	0	4	5	6	6	0	3	4	3
pamc0189576	control	c1	12u30	auto wassen	auto schoonmaken	7		bij moeder zijn (op tijd)	bij moeder zijn	1		alleen	in de auto onderweg	0		auto was vuil, en ik dacht dat ik geen geld op zak had; op tijd bij moeder zijn; toch geld: laat ik het toch maar doen	600	2		3	0	0	0	0	1	6	3	3	5	0	0	0	0	0	0	0	0
pamp0377746	patient	C1	8u	gracht uitkuisen		1		moeder bellen om bij haar te kuisen		1		alleen (met kippen)	tuin (kippenhok)	0		gevolg van gracht uitkuisen: pijn in schouders	600	1		6	4	6	2	2	3	0	3	5	3	1	0	4	4	0	4	4	0
pamp0377746	patient	c2	11u00	meegaan naar supermarkt met vriend		8		thuis blijven		7		met vriend	thuis	1	vriend	vriend heeft gokprobleem, vertrouwen ivm geldverbruik laag; meegaan naar supermarkt ter controle	600	1		6	6	1	6	5	3	6	1	3	1	1	4	4	2	4	5	4	0
pamp0382925	patient	C1	15u	enveloppe met vragenlijsten openen en vragenlijsten invullen		1		op pc (facebook en spelletjes)		9		alleen hond (dochter via telefoon)	thuis	1	dochter	geen zin om vragenlijsten in te vullen door vermoeidheid	14400	2		6	6	1	6	3	6	4	0	0	0	6	5	5	3	1	4	5	2
pamp0382925	patient	C2	16u10	aankleden en gaan wandelen met hond		6		in kamerjas buiten zitten en hond alleen laten rondlopen		9		met hond	thuis	0		pijn en vermoeidheid	14660	1	buiten zitten (pijncontrole)	5	4	0	5	2	4	1	0	0	0	4	5	3	3	0	0	4	5
pamc0119616	control	C1	20u30	eten	honger	4		hond uitlaten	wil goed baasje zijn en hond blij maken	6		met ouders	bij ouders thuis	1	vader	hond wilde buiten, pp had nog geen honger	600	2		3	3	0	0	0	1	5	3	3	5	0	0	0	0	0	0	0	0
pamp0327640	patient	C1	13u30	naat speelgoedwinkel gaan om speelgoed te kopen voor kleinkinderen (sinterklaas)		1		rust met tijdschrift thuis		9		alleen	thuis	1	onderzoekers	speelgoed diende aangekocht te worden voor sinterklaas maar toch had ze liever thuis gebleven om te rusten omdat ze vandaag naar gent moest komen voor het onderzoek	300	1	speelgoed kopen	3	4	3	4	1	1	5	3	3	2	2	3	5	1	4	0	5	0
pamp0449122	patient	C1	9u00	blijven liggen	minder pijn en minder vermoeidheid	9		opstaan om deel te nemen	afspraken nakomen met anderen	1		alleen	thuis (bed)	0		pijn, weten van de inspanning, rest van de dag niets kunnen doen na deelname	600	1	opstaan om deel te nemen	5	5	4	4	1	4	5	1	1	0	0	3	0	0	0	0	2	3
pamp0449123	patient	C2	13u	boodschappen doen	huishouden	7		rusten	minder pijn hebben	9		alleen	auto	0		moe, pijn, zin in een broodje, morgen (vandaag) ook weg (planning)	1200	2	boodschappen --> rusten	6	3	6	5	0	4	2	0	0	0	0	4	5	2	0	5	5	5
pamp0449124	patient	C3	15u30	rusten: TV kijken/slapen	pijn verminderen	9		huishouden	huishouden	7		alleen	thuis	0		pijn, voor mezelf vinden dat je iets moet doen op dag: schuldgevoel	900	2	rusten --> huishouden	5	1	6	5	4	5	2	0	0	0	0	2	5	0	0	5	5	5
pamc0203651	control	C1	11U15	Iemand zoeken om info te vergaren	goed willen doen, zorgen voor die persoon	1		brief in de brievenbus steken	werk goed doen	2		alleen	bij cliënt aan de deur	1	cliënt	mijn overtuiging over situatie: iemand zelf verantwoordelijkheid om aanwezig te zijn, geappeleerd door omgeving, dus bezorgd	300	1	brief in de brievenbus steken	2	0	0	0	0	0	3	3	3	5	0	0	0	0	0	0	2	0
pamc0203652	control	C2	11u25	broodje halen	fysieke gezondheid en plezier van eten	4		bezoek aan moeder	contact met moeder	1		alleen	in de auto	0		moeder heeft waarschijnlijk wel eten, moeder gaat gek vinden dat ik toekom met broodje, zin in broodje, en geen zin in twee keer warm eten	420	2	broodje halen --> bezoek	1	1	0	0	0	0	6	3	3	5	0	0	0	0	0	0	0	0
pamc0203653	control	C3	23u30	TV kijken	plezier	3		slapen	voldoende slaap	4		partner	thuis	0		zin om alleen in de zetel te zitten en opname te kijken, maar ook wel moe, voldoende slaap noddig	600	1	slapen (man zei " ga maar mee slapen")	2	1	0	0	0	1	5	3	3	5	0	0	0	0	0	0	0	0
pamp0457491	patient	C1	10u40	trainen	pijn aan de kant zetten en echt meth hond bezig, ontspanning	6		Tv kijken	om tot rust te komen (mentaal en fysiek)	4		alleen	thuis	1	vriend	bericht van kameraad om mee te gaan, geen zin, maar toch gegaan omdat ik weet wat ik heb en is goed gevoel achteraf, enige moment dat ik buitenkom, kon moeilijk uit bed die dag, dus vroeg een extra inspanning	1800	1	trainen	4	3	3	3	2	4	5	0	0	3	2	3	3	4	4	3	4	0
pamp0457491	patient	C2	12u00	boodschappen doen	huishouden, "moeten"	7		TV kijken	tot rust te komen, een beetje pijnvermindering	4		alleen	onderweg naar huis	1	partner	partner had iets nodig en fruit nodig, geen zin om naar winkel te gana, moe	600	2	boodschappen --> TV kijken	4	3	3	3	3	3	4	0	0	2	2	1	2	2	1	1	1	1
pamp0457491	patient	C3	18u15	Meegaan naar hondenschool	contact met anderen	1		rusten: slapen, tv kijken,…	pijnvermindering en controle	9		partner	thuis	0		s ochtends al getraind, geen zin, moe, slecht weer, door partner die zei: ik ga als jij gaat, anders bleef hij zelf tuhis, dus meegegaan	5400	1	hondenschool	6	6	6	6	6	6	6	0	0	0	5	5	5	3	5	5	5	5
pamp0481719	patient	C1	09u50	was insteken	huishouden	7		naar UZ vertrekken	gezondheid	4		alleen	thuis	0		altijd graag alles netjes, wil zoveel mogelijk doen als kinderen er niet bij zijn, wist niet goed hoeveel file er zou zijn, want normaal vroeger moment	300	1	naar UZ vertrokken	4	4	0	4	0	3	4	0	0	0	0	3	3	1	0	0	1	0
pamp0481719	patient	C2	16u30	helpen met huiswerk	helpen	1		eten voorbereiden	klaarmaken voor gezin	1		gezin	thuis	0		kinderen moeten op tijd in bed en ik heb niet graa dat ze vlak na eten gaan slapen	300	2	helpen --> eten voorbereiden	4	4	0	3	0	4	5	0	0	0	0	2	1	0	0	0	1	0
pamp0414661	patient	C1	16u30	kleinkinderen babysitten	plezier voor mezelf en kinderen	3		thuisblijven: rusten	moe en pijn	9		man	thuis	1	dochter	heel moe, ik dacht: voor dochter is het maar om te sporten, waarom moet ik eigenlinlijk komen, kan ze dat niet andere dag doen, dochter vraagt veel	60	1	babysitten	4	5	4	4	2	4	5	2	3	3	3	3	2	2	4	5	4	2
pamp0414661	patient	C2	15u20	met de hond van de buurvrouw wandelen	ik wil mezelf meer tonen: als een open persoon overkomen	6		rusten	pijn en moeheid	4		man en buurvrouw	thuis	0		beloof om te gaan wandelen, maar was ook moe en had pijn en ik doe toch maar door	600	1	wandelen met hond	4	3	4	5	4	4	4	3	3	3	3	3	2	2	4	3	2	2
pamc0235356	control	C1	13u	Blijven zitten, bekomen, mensen bekijken	ontspanning	3		thuis gaan	partner plezier doen	1		partner	restaurant	1	partner	pas gedaan met eten, kijken graag naar omgeving, partner wou naar huis, kan thuis nog bezighouden, iets drukker geworden	60	1	naar huis gaan	3	3	3	3	3	1	4	2	2	3	3	3	4	3	3	3	3	3
pamc0235356	control	C2	15u30	containerpark	huishouden	7		etentje voorbereiden	plezier en ontspanning	3		alleen	thuis	0		dan was het gedaan, maar vaak ellenlange rij, misschien overhaast en dan iets vergeten, anders misschien niet genoeg tijd voor eten	300	1	etentje voorbereiden	3	4	0	0	0	4	4	3	3	3	3	3	3	3	3	3	3	3
pamc0235356	control	C3	23u00	spelen	plezier en ontspanning	3		foto's tonen	dingen waar ik mee bezig ben laten zien	6		vrienden en partner	thuis	0		wou foto's laten zien, maar niet iedereen geïnteresseerd misschien en de sfeer was goed	120	1	spelen	4	0	0	0	0	4	6	3	3	5	0	0	0	0	0	0	0	0
pamc0217623	control	C1	14u45	spelletjes op pC	plezier en ontspanning	3		kleren op orde brengen (in kast) en alles klasseren	iets nuttig doen	7		alleen	thuis	0		Schuldgevoel --> beter iets nuttig doen dan spelletjes spelen; "al veel gewerkt en het is nog winter: zichzelf overtuigd)	600	1	spelletjes spelen	4	4	0	3	2	2	3	0	0	0	1	2	2	2	0	0	2	0
pamc0285464	control	C1	8u00	poetsen	huishouden	7		mails checken	werk	2		alleen	thuis	0		mails checken --> op gemak, anders moet je er aan beginnen; mails lopen gemakkelijk uit, heb ik dan genoeg tijd om te poetsen zoals beloof aand vrouw?	300	2	poetsen --> mails	3	0	0	0	0	1	5	3	2	5	0	0	0	0	0	0	0	0
pamc0285464	control	C2	11u30	bank	financieel	8		dochter ophalen	contact met dochter, voor dochter	1		alleen	thuis	0		tijdsdruk	60	2	bank --> dochter ophalen	5	5	0	4	0	3	5	3	3	1	0	5	0	0	0	0	0	0
pamp0495198	patient	C1	14u00	hout zagen	verwarming in gang nodig, uitsparen gas, hout nodig, activiteit graag doen	7		TV/PC	ontspannen, tijdverdrijf	3		vrouw & dochter (bezoek)	thuis	0		heel intensief, genot van activiteit op zich, maar achteraf hevige pijn; noodzaak van activiteit: beweging nodig en hout nodig	120	2	hout zagen --> PC/TV	3	4	4	2	1	4	6	5	5	4	0	0	0	0	1	0	0	0
pamc0262902	control	C1	21u15	Koken voor de volgende dag	om zich beter te voelen, rustiger en beter te kunnen slapen, was het belangrijk om nog 's avonds laat te koken	4		rusten en TV kijken (in de zetel)	om voet te laten rusten zodat er minder pijn of ongemak zou zijn	9		met dochter	thuis	0		het was al zo laat, geen tv als ze koos voor koken	600	1	koken [opm: in april 14 geopereerd aan voet --> geen constante pijn maar soms hinder of ongemak bij lange wandelingen of vermoeide dag)	5	5	1	4	3	1	6	3	3	3	1	4	1	1	1	1	1	1
pamc0227956	control	C1	11u30	grote schoonmaak	nodig/huishouden	7		flairs lezen	ontspanning	3		alleen	thuis	0		flairs liggen al een tijdje, had mezelf deadline gegeven, nu verlof	300	1	flairs lezen	5	3	0	2	0	4	3	1	3	3	1	1	1	1	1	1	1	1
pamc0227956	control	C2	08u45	dvd's binnen doen	omdat we dan 's avonds niet moesten gaan: vriend sparen/blijk maken	1		thuis zaken doen	huishouden en ontspanning, flairs moesten ook weg	7		alleen	thuis	0		fietstocht: geen zin in, want 15 km extra, wachten tot later	300	2	thuis zaken doen --> samen naar videotheek	4	3	0	1	0	4	5	1	3	3	0	0	0	0	0	0	0	0
pamp0508720	patient	C1	14U15	Kapper gaan met baby	haar van de baby was lang --> baby verzorgen	5	verzorging baby	rusten	had pijn, dus pijn verminderen/controleren	9		man + baby	thuis	0		kapper lag vast, de afspraak was er, moesten met twee gaan	30	1	kapper	3	0	3	1	0	0	3	0	0	0	0	0	1	0	0	1	0	0
pamp0508720	patient	C2	13u	werken thuis	zelf meer op mijn gemak, maak mezelf moeilijker als laat liggen	6		rusten	pijn verminderen	9		man	thuis	0		op het moment dat je kan rusten moment om te werken, man zegt dat ik het op werk moet doen, kan niet rusten als ik weet dat ik dat nog moet doen	60	1	werken	5	3	2	4	1	4	1	0	0	3	0	1	2	0	0	0	3	0
pamp0508720	patient	C3	20u	tv kijken (serie)	ontspanning	3		gaan slapen	moe, slaap nodig	4		man	thuis	0		graag serie kijken met man, graag alleen met man, slaperigheid te veel	600	1	gaan slapen	4	0	0	2	0	4	6	0	0	0	0	3	4	0	0	0	2	0
pamc0343836	control	C1	9u30	afwas doen	nodig/huishouden	7		tablet	ontspanning	3		alleen	thuis	0		wilde graag tijd nuttig gebruiken, afwas moet gedaan zijn	30	1	afwas	1	0	0	0	0	0	4	0	0	0	0	0	1	0	0	0	0	0
pamc0343836	control	C2	15u30	naar de bandencentrale rijden	op tijd zijn	5	op tijd zijn	shoppen	tijd doden op een leuke manier	3		alleen	in de stad	0		wnnr ze nu al zou vertrekken naar de bandencentrale zou ze te vroeg aankomen & wachten is niet leuk. Shoppen is altijd leuk om te doen	120	2	eerst shoppen, later pas vertrekken	1	1	0	0	0	1	3	0	0	0	0	0	0	0	0	0	0	0
pamc0301190	control	C1	13u15	naar huis gaan om te rusten (was moe en had koud)	rusten	4		naar bib en shopping center gaan	boodschappen voor avondeten en boeken terugbrengen/halen-->kennis opdoen	6		alleen	op tram	0		moest boodschappen doen en boeken terug brengenmaar wou graag thuis gaan rusten	600	1	boodschappen + bib terubrnengen/halen	3	2	1	1	0	2	6	3	2	2	1	3	4	0	0	0	2	0
pamc0301190	control	C2	18u	naar gitaarles	gitaarspelen verbeteren	6		tv kijken		3		alleen	thuis	0		vermoeidheid, niet veel zin om onder mensen te komen	1800	1	tv kijken	4	3	0	2	0	4	1	3	1	2	2	2	1	1	2	0	1	1
pamc0359567	control	C1	11u15	boodschappen	huishoudelijk	7		thuis blijven (lezen, ontspanning)	ontspanning, met partner zijn	6		man	thuis	0		vooral bekijken of er noodzaak is om te winkelen, mogelijk om vandaag te doen; voor samen met man te zijn	1800	1	thuis blijven	3	1	0	1	0	1	5	2	2	2	0	0	0	0	0	0	0	0
pamp0511498	patient	C1	10u	strijken	huishoudelijk	7		kleuren	activiteit opbouwen qua intensiteit	9		alleen	thuis	0		kleuren voor strijken bouwt activiteit geleidelijk op = beter voor pijn, strijk moest worden gedaan	600	2	eerst strijken daarna kleuren	3	3	5	3	1	2	3	0	0	3	0	0	2	0	0	3	3	0
pamp0511498	patient	C2	13u	winkelen met zoon	nodig/huishouden	7		rusten/slapen	moe & pijn, slaap nodig	9		met kinderen	thuis	0		winkelen moest gedaan zijn, slapen om activiteiten wat te verdelen en grenzen te bewaken	300	2	eerst gaan winkelen, erna langer slapen	6	5	6	4	5	5	1	0	0	0	0	3	0	1	0	3	0	0
pamc0332501	control	C1	9u	slapen	rusten	4		opstaan/wassen	actief zijn, werken (in huis)	6		alleen	thuis (in bed)	0		slecht geslapen, wou blijven liggen, te veel werk	600	1	opstaan/wassen	3	3	0	3	0	2	5	1	1	2	2	2	2	1	0	0	2	0
pamc0332501	control	C2	17u30	naar stad gaan	iets kopen voor mijzelf	3		thuis blijven (werken in huis)	zelf iets ontzeggen	8		alleen	thuis	0		mag niets kopen voor mezelf, geen recht op extra dingen (voorlopig geen werk), schuldgevoel	7200	1	naar stad gaan	6	4	0	2	0	4	6	4	4	4	2	4	1	1	1	0	0	0
pamc0332501	control	C3	17u	doktersbezoek	gezondheid	4		thuis blijven (rusten)	rusten	4		alleen	thuis	0		geen medicatie tegen verkoudheid, iedereen loopt ermee	900	1	doktersbezoek	4	2	4	2	0	2	6	0	0	2	2	3	3	0	0	0	3	0
pamc0327641	control	C1	22u	bij vrienden gaan eten	onderhouden van contacten/eten	1		naar huis gaan (rusten)	rusten	4		klasgenoten	academie	1	vrienden	vermoeid, wil niet dat iedereen tand ziet	120	1	bij vrienden gaan eten	4	3	0	1	0	2	5	4	4	3	3	3	1	0	0	0	3	0
pamc0327641	control	C2	1u00	tv kijken	ontspannen	3		slapen	rusten	4		alleen	thuis	0		vermoeid	1	1	tv kijken	1	2	0	0	0	1	2	3	3	5	1	0	0	0	0	0	0	0
pamc0361298	control	C1	14u00	administratief werk	werk	2		koffie met cliënten	onderhouden contacten cliënt	1		cliënten, collega's	bureau	0		eigenlijk dringend administratief werk moeten doen, maar nabijheid cliënten belangrijk	60	2	koffie cliënten --> administratief werk	1	1	0	0	0	1	6	1	1	3	0	1	0	0	0	0	0	0
pamc0361298	control	C2	15u30	wandeling maken	clilênten bewegen weinig --> aangrijpen	4		terug naar huis rijden: werk verder zetten	owv knie cliënt: gezondheid in het oog houden	4		cliënten	OCMW, net buiten cafeteria	1	cliënt	een van de cliënten had pijn in de knie (zegt hij) maar ik wou de confrontatie niet aangaan	60	1	terug naar huis	1	4	4	1	1	2	5	3	0	3	0	0	0	0	0	0	0	0
pamc0361298	control	C3	19u00	gesprek met cliënt verder zetten	contact onderhouden	1		vroeger stoppen met werken	plezier	3		cliënt	cliënt thuis	0		gesprek ging net goed	60	1	gesprek verder zetten	3	1	0	1	0	1	6	4	4	4	0	0	0	0	0	0	0	0
pamc0361298	control	C4	21u00	tv kijken	plezier	3		lezen	plezier	3		man	thuis	0		lui	1800	1	lezen	-999	-999	-999	-999	-999	-999	-999	-999	-999	-999	-999	-999	-999	-999	-999	-999	-999	-999
pamc0295347	control	C1	15u30	bij vriend blijven	laten ventileren, proberen losweken van idee	1		naar huis rijden	op tijd terug zijn voor vriendin, anders ziet ze me niet graag	6		vriend	vriend thuis	1	vriend	compassie met vriend, file vermijden, op tijd thuis zijn om vriendin te mailen, "projectie verlatingsangst op vriendin"	30	2	bij vriend blijven --> huis [werkt niet, te veel conflicten op werk]	3	6	0	2	2	2	4	4	2	1	1	2	0	0	0	1	0	0
pamc0377747	control	C1	17u30	presentatie nalezen	presentatie goed doen voor medestudent, groep en leerkracht	1		boek lezen	filosofische ontwikkeling	6		alleen	op school	1	lerares Spaans	wou niet nalezen, zenuwachtig, weerstand: lees niet graag dingen na, juf tegengekomen	300	2	eerst presentatie nalezen, dan boek lezen	5	5	3	5	0	5	5	0	0	0	0	5	6	6	6	6	6	5
pamc0377747	control	C2	18u10	presentatie geven	groep beter leren kennen en zij u leren kennen	1		naar huis gaan	wegvluchten, stress vermijden	4		medestudent	op school	1	medestudent	weggaan om stress te vermijden, wegvluchten, spreek niet graag voor groep	600	1	presentatie geven	6	6	6	6	6	6	1	0	0	0	5	6	6	0	6	6	6	6
pamc0312568	control	C1	14u00	administratie over kind in opvang bijwerken	moest gedaan worden in functie van komend gesprek met ouders	1		ontsmetten van speelgoed in opvang	moet gedaan worden	2		alleen	op het werk	0		beide activiteiten moeten gebeuren, administratie is iets wat enkel door mezelf kan worden gedaan, het ontsmetten kan iedereen	60	1	administratie	4	2	0	3	1	2	3	3	2	3	2	2	2	2	2	2	3	2
pamc0312568	control	C2	6u30	tas klaarmaken voor het werk	huishoudelijk	7		ontbijten	samen met kinderen ontbijten	1		met kinderen	thuis	0		tas rustig klaarmaken zodat ik zeker alles bij heb, thuis ontbijten biedt meer keuze dan op de trein	30	1	tas klaarmaken	4	2	0	4	1	4	3	1	2	3	4	2	3	1	1	1	1	1
pamc0382926	control	C1	21u30	TV kijken met man	man gezelschap houden	1		Op PC	contacten onderhouden	1		met man	thuis	0		wil man niet alleen laten omdat hij het moeilijk heeft, het TV programma interesseert met niet, wilde emoties van zich afschrijven in dagboek op pc	30	2	eerst belist om op pc te werken, later terug naar beneden gegaan om opnieuw bij man te zitten, maar dan toch opnieuw naar pc omdat het programma niet interessant was	4	4	0	3	0	4	5	0	0	0	3	3	4	0	3	5	5	1
pamc0391496	control	C1	19u30	iets gaan drinken met vriendinnen	vriendschap onderhouden	1		thuis TV kijken	ontspanning	3		alleen	thuis	0		vermoeidheid	600	1	iets gaan drinken	2	0	0	0	0	1	6	0	0	1	0	0	0	0	0	0	0	0
pamc0276758	control	C1	11u50	nu eten boven in de keuken	honger	4		later eten met toffe collega's	bij praten, leuke middag beleven	1		collega	op het werk	1	collega's	grote honger, collega's van latere shift zijn leuker	10	1	direct eten (act1)	4	2	0	2	0	2	5	3	3	2	0	4	2	0	0	0	5	0
pamc0276758	control	C2	23u15	TV kijken met vriend	ontspanning	3		gaan slapen	moe	4		vriend	thuis	1	vriend	wilde weten hoe de film af liep, vriend was moe maar ikzelf nog niet, drinken was nog niet op	60	1	direct gaan slapen	4	0	0	1	0	4	5	4	3	4	0	4	0	0	0	0	1	0
pamp0475786	patient	C1	12u35	versieringen	graag doen	3		rusten	pijn en vermoeidheid verminderen	4		alleen (poedel)	thuis	0		pijn en vermoeidheid, graag versieren, gaat niet lukken, anders doodmoe; wist dat vandaag weg moest --> niet meer vermoeien	300	1	rusten	3	3	6	1	2	3	2	2	2	2	4	0	3	3	0	4	1	3
pamc0428181	control	C1	17u30	naar huis gaan	prikkels vermijden	4		boodschappen doen	eten kopen	7		alleen	auto	0		tijdsdruk, prikkelbaar door nachtdienst op werk, wil rust, nog iets in ijskast staan om te eten	10	1	naar huis gaan	2	0	0	1	0	0	6	0	0	1	0	4	4	0	0	0	4	0
pamc0428181	control	C2	17u30	naar huis gaan	prikkels vermijden	4		bij moeder langsgaan	moeder plezier doen	1		alleen	auto	0		tijdsdruk, prikkelbaar, wil rust, moeder wil mij zien	10	1	naar huis gaan	-999	-999	-999	-999	-999	-999	-999	-999	-999	-999	-999	-999	-999	-999	-999	-999	-999	-999
pamc0428181	control	C3	18u00	opzoekingswerken rond reis op pc	reis voorbereiden, stress vermijden	4		op bezoek gaan bij iemand	vriend plezier doen	1		alleen	thuis	0		tijdsdruk, geen zin, geen energie, moe, beloofd	60	2	eerst op bezoek gaan bij iemand, dan op pc	4	2	0	4	0	3	5	0	0	0	0	4	4	0	0	0	4	0
pamc0428181	control	C4	20u00	bij bezoek blijven	ontspannen	3		naar huis gaan, programma kijken	programma zien, zorg dragen voor zelf	4		bezoek	bij bezoek thuis	1	bezoek	wou programma zien, lang geleden persoon gezien, minder opslorpend dan gedacht, aangenaam	60	1	bij bezoek blijven	4	0	0	1	0	4	5	5	2	5	0	0	0	0	0	0	0	0
pamc0428181	control	C5	20u30	computer	reis voorbereiden, stress vermijden	4		in zetel zitten, tv kijken	ontspannen	3		alleen	thuis	0		eens in zetel, blijf in zetel, programma toch al gedaan, besef dat je moet ontspannen, wertrek op reis en heb nog niets voorbereid	30	2	eerst computer, dan tv	-999	-999	-999	-999	-999	-999	-999	-999	-999	-999	-999	-999	-999	-999	-999	-999	-999	-999
pamc0428181	control	C6	00u00	gaan slapen	rusten	4		computer	verslag maken voor school	2		alleen	thuis	0		moet in nachtritme blijven, moet verslag maken, fysiek moe	300	1	computer	-999	-999	-999	-999	-999	-999	-999	-999	-999	-999	-999	-999	-999	-999	-999	-999	-999	-999
pamc0428181	control	C7	3u00	gaan slapen	rusten	4		computer	schoolwerk	2		alleen	thuis	0		moet in nachtritme blijven, moet voor school werken, fysiek moe	30	1	slapen	-999	-999	-999	-999	-999	-999	-999	-999	-999	-999	-999	-999	-999	-999	-999	-999	-999	-999
pamc0408340	control	C1	19u30	meegaan met man zoon afzetten	man plezier doen	1		thus blijven en in zetel zitten	ontspannen	3		man + zoon	thuis	0		man 2 dagen niet gezien, gezellig in auto, niet veel zin om mee te gaan, weet dat man het zou appreciëren moest ik meegaan, nog was te doen	4	2	eerst mee met man, dan ontspannen in zetel	4	3	0	3	3	4	6	4	4	4	0	0	0	0	0	0	0	0
pamp0527243	patient	C1	9u30	verder werken op PC	moest gedaan zijn voor werk en wil graag alles perfect af	6		in zetel zitten, tv kijken	rusten, pijn & vermoeidheid doen afnemen	9		alleen	thuis	0		frustratie omdat PC werk niet lukte, was heel moe en had veel pijn	7200	1	verder op PC werken	5	5	6	6	4	4	0	0	0	0	0	6	6	6	0	5	5	4

## Sheet: INTERVIEW_DAY
		"interview" (questionnaire general day)
PPID		TYPICAL_DAY	RATING_DAY	SATISFIED_DAY	DID_WHAT_PLANNED	VALUED_ACTIVITIES	FATIGUE	PAIN	FATIGUE_HAMPERED	PAIN_HAMPERED	FATIGUE_ATTENTION	PAIN_ATTENTION	DAY_HAPPY	DAY_ENTHOUSIASTIC	DAY_RELAXED	DAY_SAD	DAY_NERVOUS	DAY_IRRITATED	DAY_ANGRY	DAY_AFRAID	DAY_POWERLESS	DAY_FRUSTRATED	DAY_HELPLESS	DAY_CONDIFENT	DAY_LOVED	DAY_ALERT	DAY_OPTIMISTIC	DAY_RESTLESS	DAY_DETERMINED	DAY_ENERGETIC	INTERVIEW_MOTIVATION
log-in number limesurvey		0-10	0-10	0-10	0-10	0-10	0-10	0-10	0-10	0-10	0-10	0-10	0-6	0-6	0-6	0-6	0-6	0-6	0-6	0-6	0-6	0-6	0-6	0-6	0-6	0-6	0-6	0-6	0-6	0-6	0-10
pamp0048467	patient	9	6	6	8	6	8	7	8	7	5	5	0	0	1	0	0	2	2	0	0	2	0	3	5	1	3	2	1	0	10
pamc0026560	control	8	8	8	6	9	7	1	1	0	0	0	5	6	4	0	1	0	0	0	1	1	1	5	5	5	6	3	4	5	8
pamc0014822	control	9	6	9	10	10	3	0	0	0	0	0	4	5	3	0	2	2	0	0	0	1	0	5	6	6	4	2	5	3	10
pamp0058851	patient	8	6	8	8	8	8	3	7	4	4	4	4	4	4	1	1	1	1	1	1	1	1	3	6	3	4	1	3	2	9
pamp0102065	patient	5	3	8	9	10	8	6	2	5	1	1	5	5	4	0	5	0	0	0	0	0	0	5	5	4	6	5	5	1	8
pamp0067892	patient	5	5	6	7	5	6	6	7	5	3	2	6	5	5	0	0	0	0	0	0	0	0	0	3	4	3	0	4	3	6
pamp0125697	patient	0	2	4	2	4	8	7	7	7	0	0	5	5	2	0	5	0	0	0	0	0	0	3	6	2	5	5	0	2	10
pamp0072841	patient	2	8	8	10	10	7	6	2	2	7	8	5	5	4	1	3	1	0	0	0	1	1	3	2	3	4	3	4	2	9
pamp0087912	patient	1	5	4	5	3	8	7	8	8	4	4	2	2	3	3	2	3	2	1	4	4	3	2	2	2	3	3	4	2	7
pamp0172397	patient	5	5	3	5	5	5	5	5	5	5	5	3	3	2	2	2	3	3	2	2	3	2	3	3	3	3	2	3	3	6
pamp0131744	patient	8	5	3	3	5	9	8	7	7	6	6	1	1	2	3	3	4	3	0	5	5	0	3	2	2	4	3	3	1	9
pamc0067893	control	5	7	8	9	6	2	1	5	1	5	1	4	4	4	2	3	3	2	0	0	1	0	3	4	4	5	3	4	5	7
pamc0032447	control	2	7	8	8	7	2	0	0	0	0	0	2	3	5	2	0	0	0	0	4	2	0	3	4	3	4	0	3	4	8
pamp0162331	patient	8	5	8	6	8	7	6	7	7	4	3	5	5	6	0	4	1	0	0	4	4	1	6	3	5	5	3	3	3	9
pamp0241379	patient	0	0	3	0	6	9	8	6	8	3	3	0	2	0	6	6	5	6	6	6	6	2	3	6	4	5	6	5	1	0
pamp0295346	patient	8	8	8	10	9	6	6	4	4	3	3	3	3	3	0	4	5	5	0	5	5	0	4	4	5	5	1	5	3	9
pamc0087913	control	5	5	5	7	5	8	0	2	0	5	0	4	4	4	2	3	3	2	3	3	3	3	1	5	6	6	3	1	6	10
pamp0217622	patient	5	5	8	3	3	7	6	6	5	3	3	3	3	4	0	0	0	0	0	0	0	0	5	6	6	5	0	5	5	9
pamp0189575	patient	8	5	8	9	8	4	4	5	5	2	2	5	4	3	1	1	1	0	0	1	1	0	0	4	3	3	1	3	1	10
pamp0098737	patient	2	7	8	10	10	3	5	3	5	6	6	6	6	4	0	0	0	0	1	0	0	0	2	6	5	6	0	6	3	10
pamp0276757	patient	5	5	6	7	4	6	7	5	3	5	4	5	4	2	0	4	0	0	0	0	2	0	3	6	4	5	3	4	2	9
pamp0235355	patient	7	5	8	9	7	5	5	4	5	2	3	4	4	4	4	2	0	0	0	0	0	0	3	6	4	5	2	3	4	8
pamp0193167	patient	6	5	4	3	2	8	8	7	8	8	7	3	3	3	3	3	3	3	3	3	3	3	4	5	3	5	3	5	2	8
pamp0258136	patient	7	7	8	8	7	7	7	6	8	5	5	5	5	5	0	4	0	0	0	0	0	0	5	5	4	4	4	5	4	8
pamc0058852	control	9	9	9	7	9	7	0	0	0	0	0	6	6	3	0	0	0	0	0	0	0	0	6	3	6	5	4	6	5	10
pamp0332500	patient	7	7	7	6	5	8	8	7	8	8	8	0	0	0	4	5	5	4	4	4	5	4	0	0	0	0	4	4	3	8
pamc0048468	control	6	8	9	9	9	5	0	0	0	6	0	5	5	3	0	3	0	0	0	0	0	0	4	4	5	5	4	5	5	8
pamc0125698	control	5	6	8	9	9	4	5	2	2	1	5	5	5	5	0	0	0	0	0	0	0	0	5	5	5	5	0	5	4	9
pamp0359566	patient	1	8	10	10	10	6	6	7	7	3	2	6	6	5	0	5	0	0	0	0	0	0	5	6	4	6	3	4	4	10
pamp0119615	patient	3	4	3	2	2	6	7	4	3	3	0	1	1	0	5	3	0	0	2	2	3	1	1	2	2	1	5	1	2	4
pamc0193168	control	8	5	7	7	6	6	7	6	5	5	8	1	1	2	1	4	4	1	1	4	4	1	2	2	5	1	2	2	2	7
pamc0098738	control	8	5	8	9	8	7	3	2	2	1	1	4	4	3	0	0	3	0	0	0	0	0	4	5	4	5	1	3	3	9
pamc0072842	control	7	5	5	10	4	6	2	5	1	2	1	4	3	4	0	0	5	0	0	0	1	1	4	4	3	3	0	3	2	8
pamc0102066	control	6	5	8	8	8	5	3	0	1	1	2	4	3	4	0	0	1	0	0	0	0	0	3	3	3	4	0	3	3	7
pamp0301199	patient	9	5	7	7	9	6	5	4	4	3	3	5	5	5	0	3	0	0	0	0	0	0	5	5	3	5	2	4	3	8
pamc0155643	control	4	6	9	9	9	3	0	0	0	2	0	5	5	4	0	0	0	0	0	0	0	0	3	4	4	5	3	3	4	9
pamp0361297	patient	7	7	9	7	9	5	7	4	3	2	2	5	5	2	0	0	0	0	0	0	0	0	5	4	5	5	2	4	2	8
pamc0131745	control	8	8	9	8	8	2	0	0	0	0	0	4	4	5	1	1	1	1	1	1	1	1	5	4	5	5	1	4	4	7
pamc0144844	control	0	5	10	10	5	2	1	0	0	0	0	6	6	4	0	0	0	0	0	0	0	0	2	6	6	6	0	4	6	9
pamc0162332	control	10	4	10	10	10	6	7	5	5	6	6	6	6	6	0	4	0	0	0	4	4	1	4	6	6	6	1	4	4	9
pamc0172398	control	5	5	7	2	7	1	1	1	1	1	0	3	3	3	1	3	3	3	0	3	3	0	6	3	6	5	5	6	6	10
pamc0189576	control	2	5	10	10	10	0	0	0	0	0	0	6	6	6	0	0	0	0	0	0	0	0	5	6	6	6	0	5	6	10
pamp0377746	patient	6	7	7	9	8	9	8	3	6	2	6	5	4	5	1	6	5	4	6	6	5	0	1	0	6	1	6	6	4	7
pamp0382925	patient	8	9	9	5	3	10	8	9	9	2	6	1	2	5	6	5	5	3	0	0	5	1	0	2	4	2	5	3	1	3
pamp0391495	patient	0	0	3	8	1	10	9	8	3	9	7	4	4	0	3	1	1	0	0	3	4	1	2	4	4	3	5	3	1	3
pamp0408349	patient	7	5	6	4	5	7	3	6	2	1	1	5	5	5	1	1	0	0	0	0	0	0	5	5	2	4	0	5	1	8
pamc0119616	control	8	5	8	7	6	1	0	1	0	1	0	5	4	5	0	5	4	0	0	0	2	0	4	4	5	4	1	4	4	8
pamp0327640	patient	5	7	3	7	8	7	7	6	7	7	7	4	3	2	2	3	3	3	3	3	4	3	4	5	3	3	4	4	1	7
pamp0449122	patient	9	4	3	3	6	8	8	10	10	10	10	0	3	0	0	4	5	0	0	5	5	5	0	0	3	0	4	1	0	10
pamc0203651	control	7	5	8	9	9	3	1	0	0	0	0	5	5	5	0	1	0	0	0	0	0	0	4	5	4	4	1	4	5	9
pamp0457491	patient	4	7	9	8	10	8	8	7	7	6	6	4	3	5	3	1	3	3	5	4	3	4	4	3	1	2	5	3	3	3
pamp0432297	patient	6	5	7	7	7	7	7	5	5	1	1	3	3	3	0	0	0	0	0	0	0	0	3	6	3	3	0	3	1	10
pamp0481719	patient	2	4	7	10	6	8	7	6	10	6	7	3	0	2	0	5	1	0	0	0	0	0	1	4	2	0	1	0	1	7
pamp0414661	patient	8	4	3	7	4	8	8	6	6	7	7	3	3	2	1	3	1	2	2	2	1	1	2	2	3	3	3	4	4	10
pamc0235356	control	7	8	8	7	8	2	0	0	0	1	0	4	4	5	0	1	1	0	0	0	0	0	4	4	4	5	1	3	4	8
pamc0217623	control	8	5	5	4	0	3	3	0	0	0	2	3	1	4	1	2	2	2	0	0	2	0	3	0	3	1	1	1	0	9
pamc0285464	control	7	5	8	10	8	3	1	0	0	1	0	4	4	5	0	0	0	0	0	0	0	0	5	5	4	5	3	4	5	8
pamc0258137	control	10	8	9	9	9	7	1	1	0	1	0	6	6	6	0	2	0	0	0	0	2	0	5	4	4	5	2	5	5	9
pamp0495198	patient	8	7	9	9	9	7	8	5	5	2	2	5	5	5	0	0	1	0	1	0	0	0	4	5	2	5	5	3	4	8
pamc0262902	control	2	5	8	8	8	5	3	2	2	2	2	5	5	4	1	4	1	1	1	3	1	1	5	6	5	5	3	5	5	9
pamc0227956	control	6	5	7	6	8	2	0	2	0	1	0	4	4	4	0	0	0	0	0	0	0	0	4	4	4	4	1	4	4	8
pamp0508720	patient	4	5	8	9	9	8	4	6	6	1	1	5	5	4	0	2	0	0	0	0	2	0	5	5	5	5	1	4	1	9
pamp0428180	patient	8	7	8	8	8	6	5	5	5	5	4	4	4	3	3	3	0	0	1	0	0	0	5	5	4	3	1	4	4	7
pamc0343836	control	0	7	8	8	8	2	0	0	0	0	0	4	4	4	0	0	0	0	0	0	0	0	4	4	4	4	0	3	4	9
pamc0241370	control	9	5	6	9	7	3	0	0	0	2	0	3	3	3	2	1	1	1	0	0	1	0	3	3	4	3	1	3	3	7
pamc0301190	control	8	4	3	4	3	8	5	7	1	7	1	3	1	2	4	2	5	5	1	0	3	0	1	1	2	3	4	1	1	7
pamc0359567	control	8	8	9	8	9	1	0	0	0	0	0	5	5	5	0	0	0	0	0	0	0	0	5	5	5	5	0	5	5	9
pamp0511498	patient	9	5	3	5	3	8	8	8	8	8	8	0	0	0	0	3	0	0	0	3	0	3	0	5	3	1	0	2	0	9
pamc0332501	control	6	7	6	4	8	5	2	3	1	3	1	4	3	5	2	2	1	0	0	0	0	0	4	4	3	3	1	4	2	10
pamc0327641	control	7	5	7	7	7	4	0	4	0	6	0	3	4	3	4	1	2	0	0	0	2	0	1	4	4	5	4	3	5	10
pamc0361298	control	9	6	7	7	7	2	1	1	0	0	0	4	4	4	0	0	0	0	0	0	0	0	5	5	4	5	1	5	5	9
pamc0295347	control	9	5	7	8	9	2	0	0	0	7	0	4	4	5	1	1	1	0	0	1	1	0	4	5	2	5	0	4	4	8
pamc0377747	control	5	3	8	8	9	8	8	8	2	7	7	3	3	0	5	6	6	6	6	6	6	6	0	0	5	2	6	1	1	10
pamc0312568	control	7	7	8	9	7	3	0	1	0	0	0	5	4	4	0	1	0	0	0	0	0	0	4	5	3	3	1	3	4	8
pamc0382926	control	5	5	8	9	9	8	6	2	5	6	6	5	5	3	1	0	1	0	1	2	2	0	5	5	5	5	1	4	3	8
pamc0391496	control	4	7	10	10	10	1	0	0	0	1	0	6	6	6	0	1	0	0	0	0	0	0	5	5	4	5	0	6	6	10
pamc0276758	control	10	6	9	9	8	1	0	0	0	0	0	6	6	-999	0	1	1	0	0	0	0	0	5	5	4	5	0	4	6	9
pamp0475786	patient	5	4	6	3	3	8	7	8	8	8	4	3	3	2	3	1	1	2	0	0	1	2	3	6	5	6	1	4	3	9
pamc0428181	control	2	3	3	7	8	8	0	7	0	8	0	4	0	2	0	4	2	0	0	0	4	0	4	0	5	4	4	3	3	8
pamc0408340	control	7	7	8	8	6	6	3	2	2	4	4	5	5	5	1	2	2	1	0	0	0	0	5	5	5	5	1	5	5	9
pamp0527243	patient	2	5	5	6	8	10	10	7	7	5	7	0	0	0	0	3	5	6	4	6	6	4	3	3	5	0	0	6	0	7
